# Supplementary material for: Structural competition between π⋯π interactions and halogen bonds: a crystallographic study
Source: Royal Society of Chemistry journal article supplement (doi:10.1039/c2ce26520f), 2012-11-08

## Structural competition between $\pi\cdots\pi$ interaction and halogen bond: a crystallographic study

Baoming Ji,<sup>a\*</sup> Weizhou Wang,<sup>a</sup> Dongsheng Deng,<sup>a</sup> Yu Zhang,<sup>a</sup> Lei Cao,<sup>ab</sup> Le Zhou,<sup>b</sup> Chuansheng Ruan<sup>ac</sup> and Tiesheng Li<sup>c</sup>

<sup>a</sup> College of Chemistry and Chemical Engineering, Luoyang Normal University, Luoyang 471022, China. Fax: 86 379 65523821; Tel: 86 379 65523821; E-mail: lyhxxjbm@126.com

<sup>b</sup> Northwest Agriculture and Forest University, Yangling 712100, People's Republic of China

<sup>c</sup> Department of Chemistry, Zhengzhou University, Zhengzhou 450052, People's Republic of China

### Supporting Information

Fig. S1 X-ray powder diffraction patterns of cocrystals **1a**, **2a**, **1b**, **2b**, **1c** and **2c**.

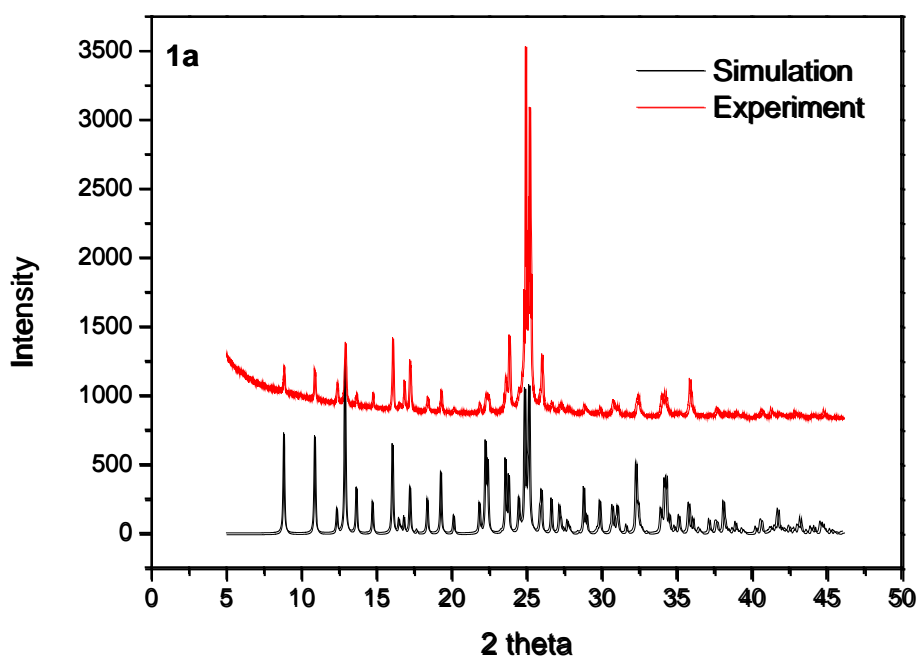

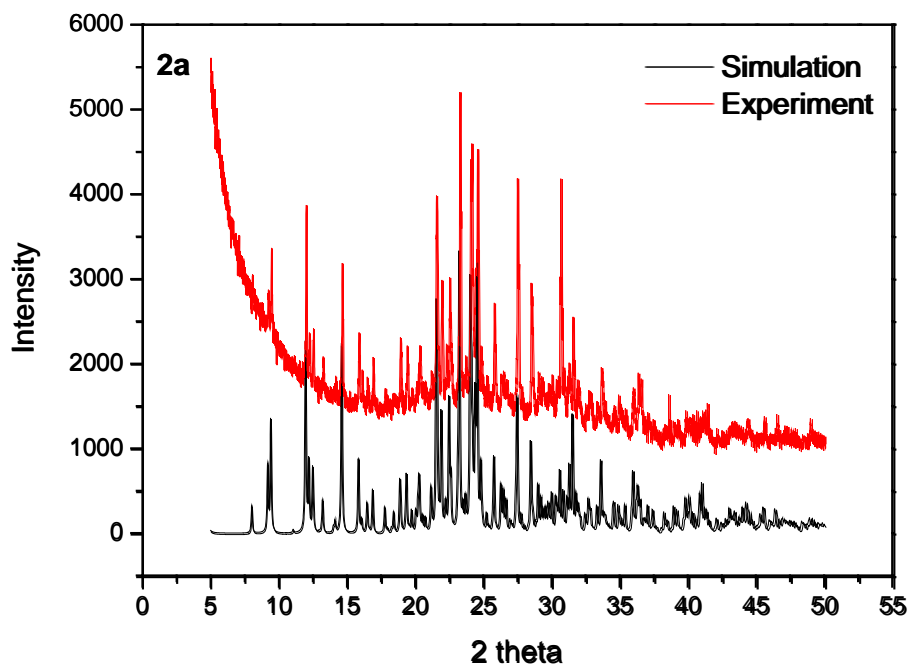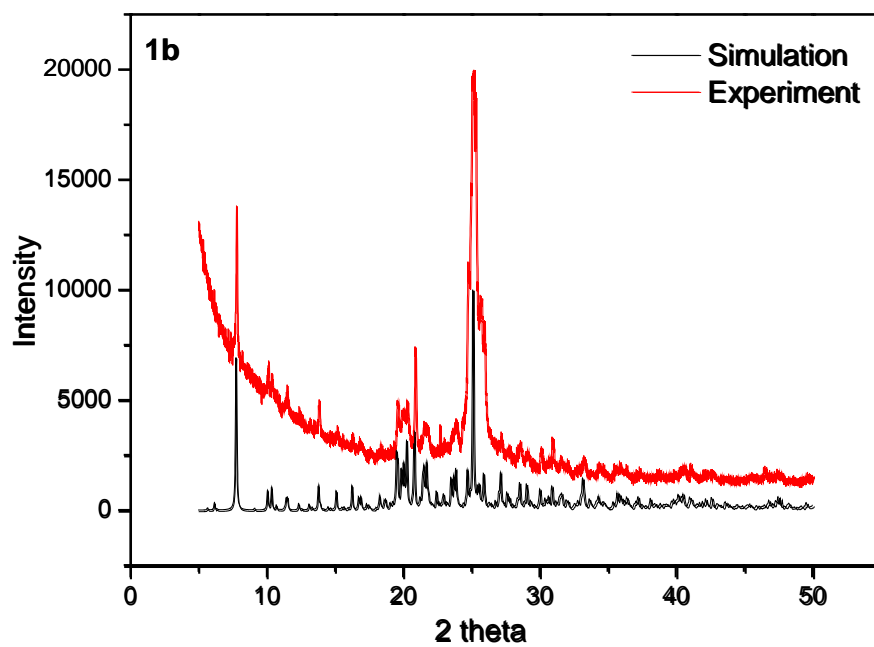

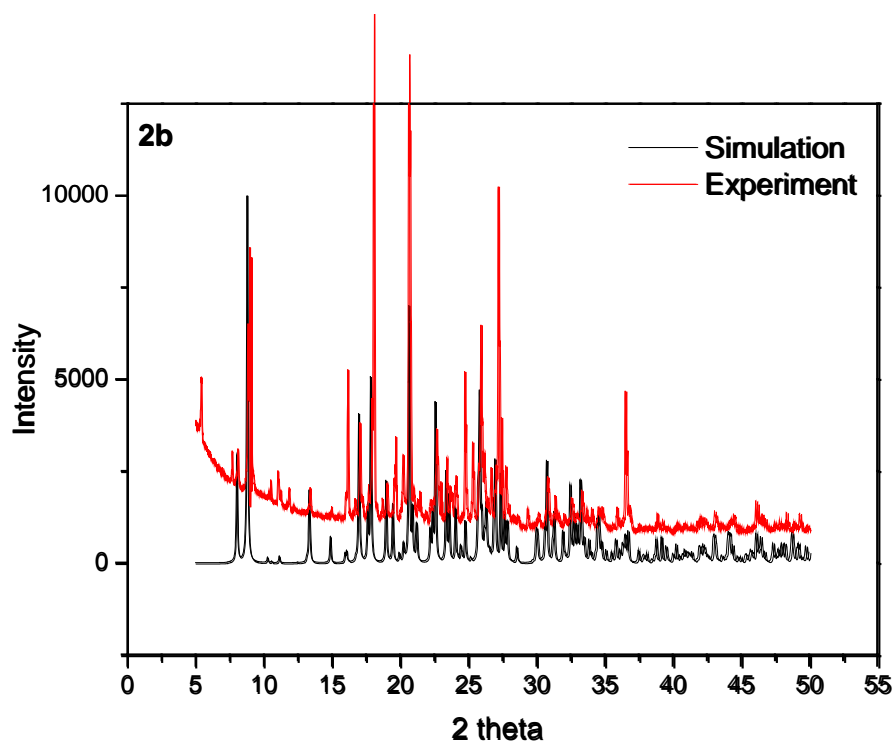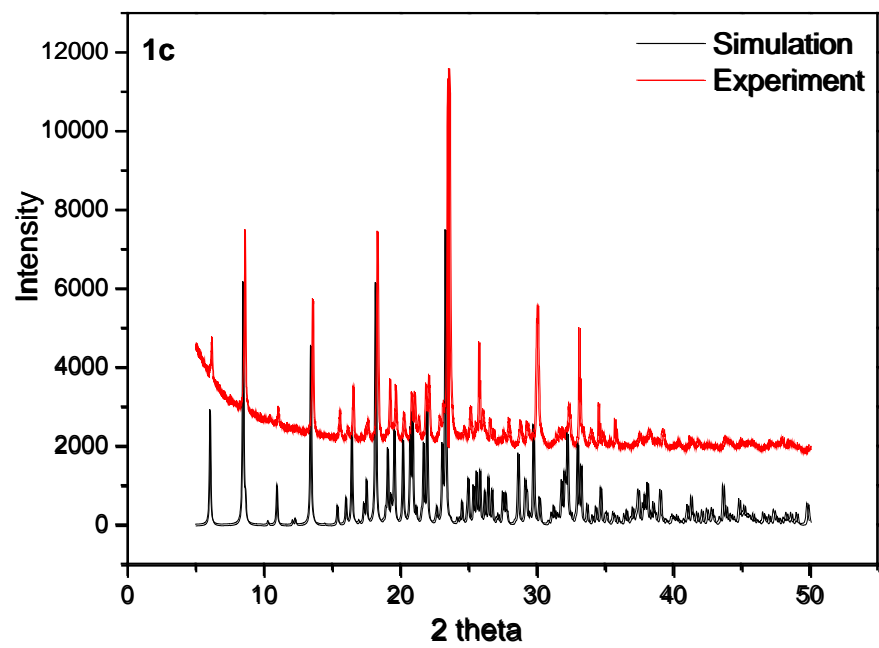

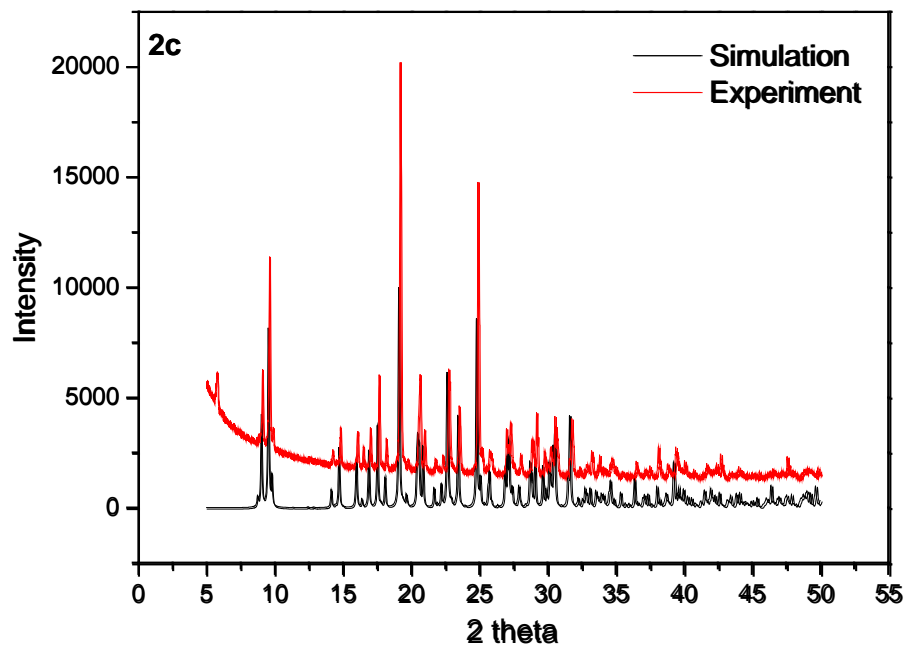

Supplement: c2ce26520f.pdf [file c2ce26520f.pdf]
